# Supplementary material for: Pseudomonas syringae pv. syringae Uses Proteasome Inhibitor Syringolin A to Colonize from Wound Infection Sites
Source: PubMed Central journal article supplement (PMC3610659; doi:10.1371/journal.ppat.1003281), 2013-03-28
Supplement: ppat.1003281.s015.pdf [file ppat.1003281.s015.pdf]

**Table S2** Plasmids and strains used in this study.

| Plasmid                           | Description                                                | Resistance* | Reference            |
|-----------------------------------|------------------------------------------------------------|-------------|----------------------|
| pFK78                             | pML123 expressing GFP                                      | Gm          | This work            |
| pML123                            | Broad host range cloning vector                            | Gm          | Labes et al., 1990   |
| pPL3syl (p63::syl)                | Cosmid carrying <i>sylA-E</i> of <i>PsyB301D-R</i>         | Tet         | Ramel et al. 2009    |
| Strain                            | Description                                                | Resistance* | Reference            |
| <i>E. coli</i>                    | Triparental mating pRK600                                  | Cm          | R. Dudler            |
| <i>PsyB728a-WT</i>                | Isolated from snap beans                                   | Rif         | Loper & Lindow, 1999 |
| <i>PsyB728a-ΔsylC</i>             | $\Delta$ sylC mutant of <i>PsyB728a-WT</i>                 | RifTet      | Groll et al., 2008   |
| <i>PsyB728a-WT-GFP</i>            | <i>PsyB728a-WT</i> carrying pFK78                          | RifGm       | This work            |
| <i>PsyB728a-ΔsylC-GFP</i>         | <i>PsyB728a-ΔsylC</i> carrying pFK78                       | RifTetGm    | This work            |
| <i>PsyB301D</i>                   | Isolated from snap beans                                   | Rif         | Amrein et al., 2004  |
| <i>PsyB301D ΔsylC</i>             | $\Delta$ sylC mutant of <i>PsyB301D-R</i>                  | RifTet      | Amrein et al., 2004  |
| <i>PsyB301D ΔsylD</i>             | $\Delta$ sylD mutant of <i>PsyB301D-R</i>                  | RifTet      | Amrein et al., 2004  |
| <i>PsyB301D ΔsylA-E</i>           | $\Delta$ sylA-E cluster deletion mutant of <i>PsyB728a</i> | Rif         | Ramel et al., 2009   |
| <i>PsyB301D ΔsylA-E(pPL3syl)</i>  | <i>PsyB301D ΔsylA-E</i> carrying pPL3syl                   | RifTet      | Ramel et al., 2009   |
| <i>PsyB301D-GFP</i>               | <i>PsyB301D</i> carrying pFK78                             | RifGm       | This work            |
| <i>PsyB301D ΔsylC-GFP</i>         | <i>PsyB301D ΔsylC</i> carrying pFK78                       | RifTetGm    | This work            |
| <i>PsyB301D ΔsylD-GFP</i>         | <i>PsyB301D ΔsylD</i> carrying pFK78                       | RifTetGm    | This work            |
| <i>PsyB301D ΔsylA-E-GFP</i>       | <i>PsyB301D ΔsylA-E</i> carrying pFK78                     | RifGm       | This work            |
| <i>PsyB301D Δsyl(pPL3syl)-GFP</i> | <i>PsyB301D ΔsylA-E</i> carrying pPL3syl and pFK78         | RifTetGm    | This work            |

\* Cm, Chloramphenicol; Gm, Gentamycin; Rif, Rifampicin; Tet, Tetracyclin

**Amrein, H., Makart, S., Granado, J., Shakya, R., Schneider-Pokorny, J., and Dudler, R.** (2004) Functional analysis of genes involved in the synthesis of syringolin A by *Pseudomonas syringae* pv. *syringae* B301D-R. *Mol. Plant-Microbe Interact.* **17**, 90-97.

**Groll, M., Schellenberg, B., Bachmann, A. S., Archer, C. R., Huber, R., Powell, T. K., Lindow, S., Kaiser, M., and Dudler, R.** (2008) A plant pathogen virulence factor inhibits the eukaryotic proteasome by a novel mechanism. *Nature* **452**, 755-758.

**Hwang, M. S. H., Morgan, R. L., Sarkar, S. F., Wang, P. W., and Guttman, D. S.** (2005). Phylogenetic characterization of virulence and resistance phenotypes of *Pseudomonas syringae*. *Appl. Environ. Microbiol.* **71**, 5182-5191.

**Labes M., Pühler A., and Simon R.** (1990) A new family of RSF1010-derived expression and lac-fusion broad-host-range vectors for gram-negative bacteria. *Gene* **89**, 37-46.

**Loper, J. E., and Lindow, S. E.** (1987) Lack of evidence for *in situ* fluorescent pigment production by *Pseudomonas syringae* pv. *syringae* on bean leaf surfaces. *Phytopathol.* **77**, 1449-1454.

**Ramel, C., Tobler, M., Meyer, M., Bigler, L., Ebert, M. O., Schellenberg, B., and Dudler, R.** (2009) Biosynthesis of the proteasome inhibitor syringolin A: the ureido group joining two amino acids originates from bicarbonate. *BMC Biochemistry* **10**:26
